# Supplementary material
Source: PubMed Central journal article supplement (PMC9433446)

Figure 1A:

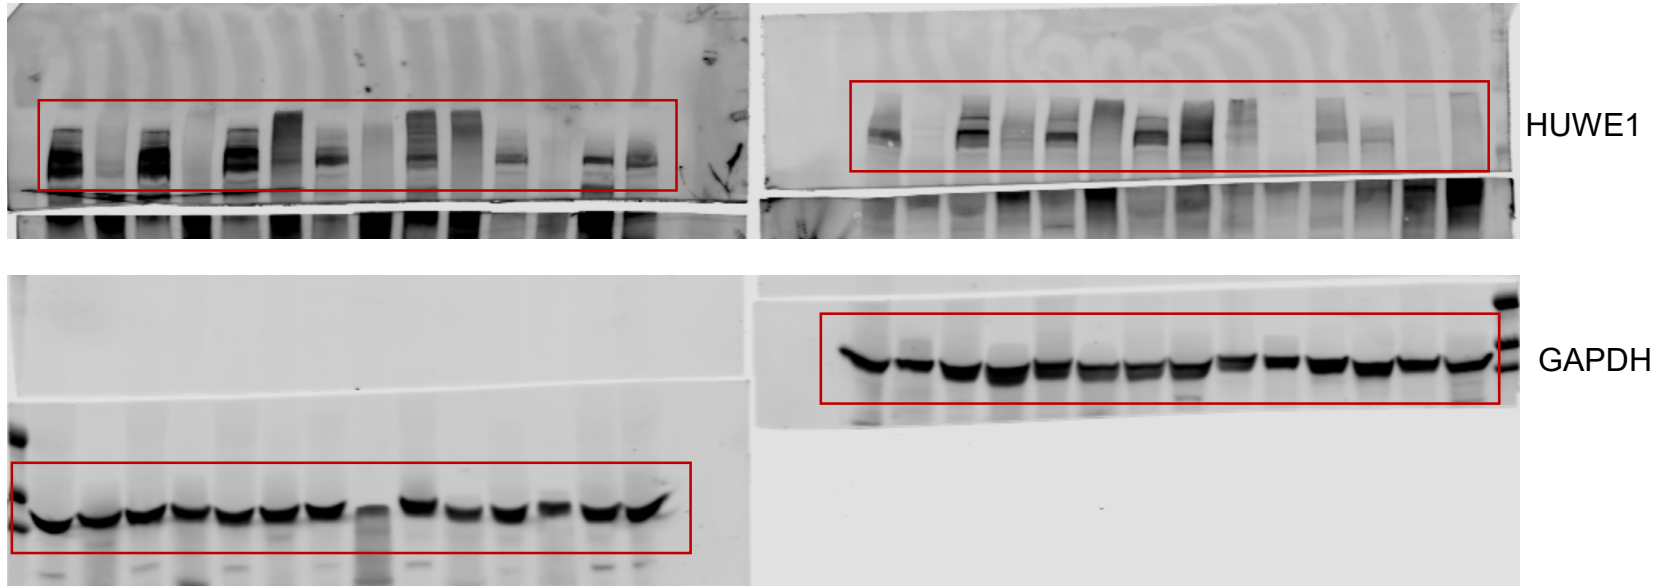

Figure 1E:

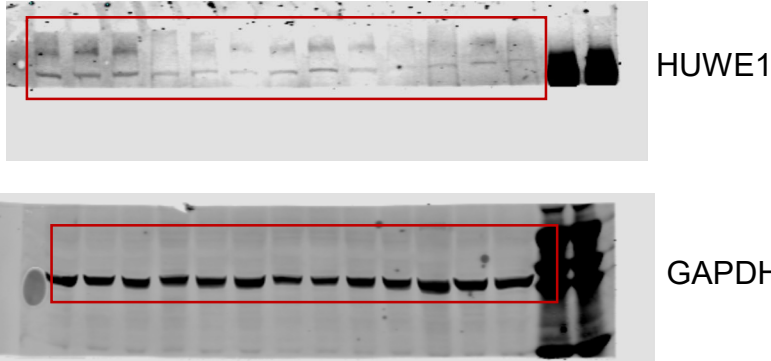

Figure 1G:

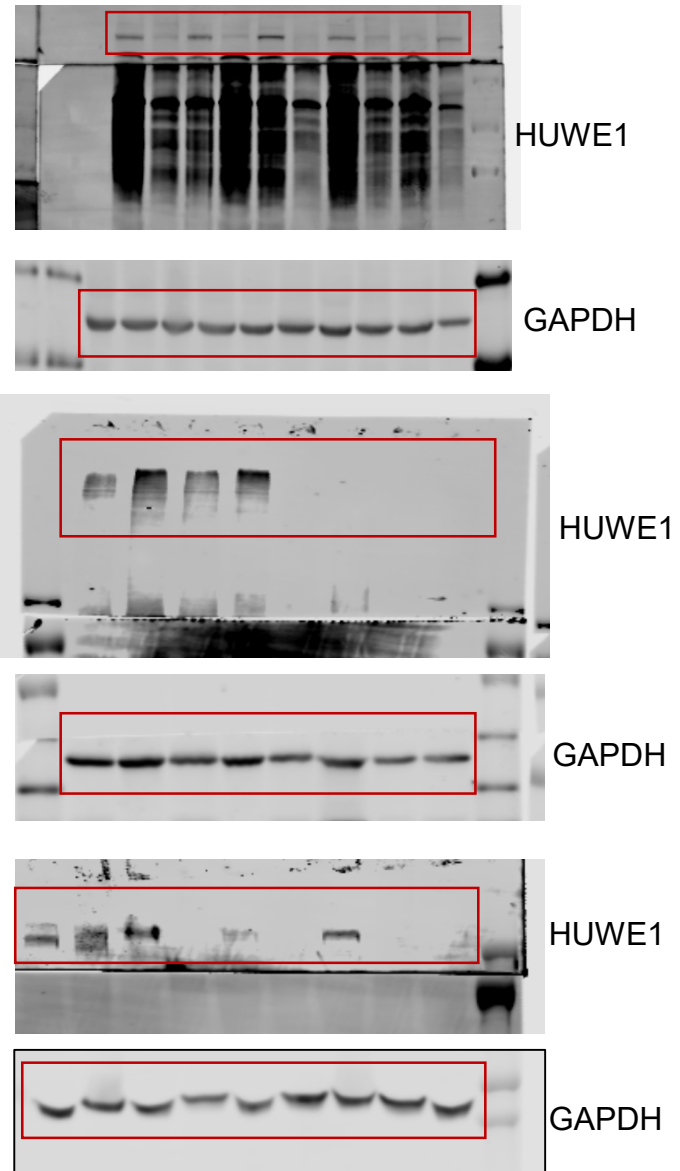

Figure 2A:

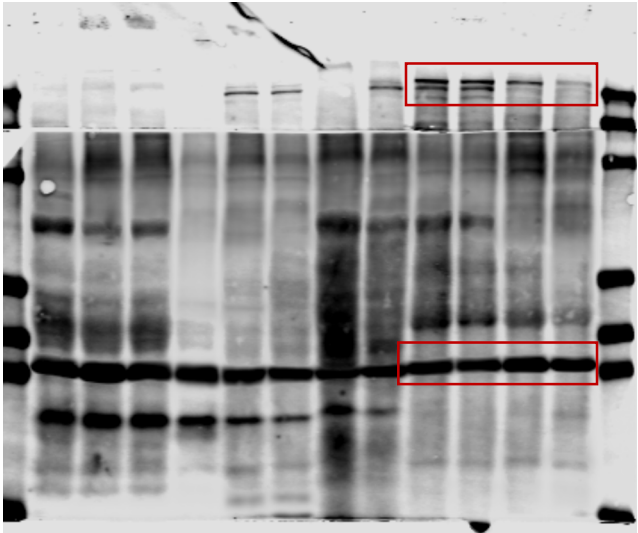

Huwe1

Gapdh

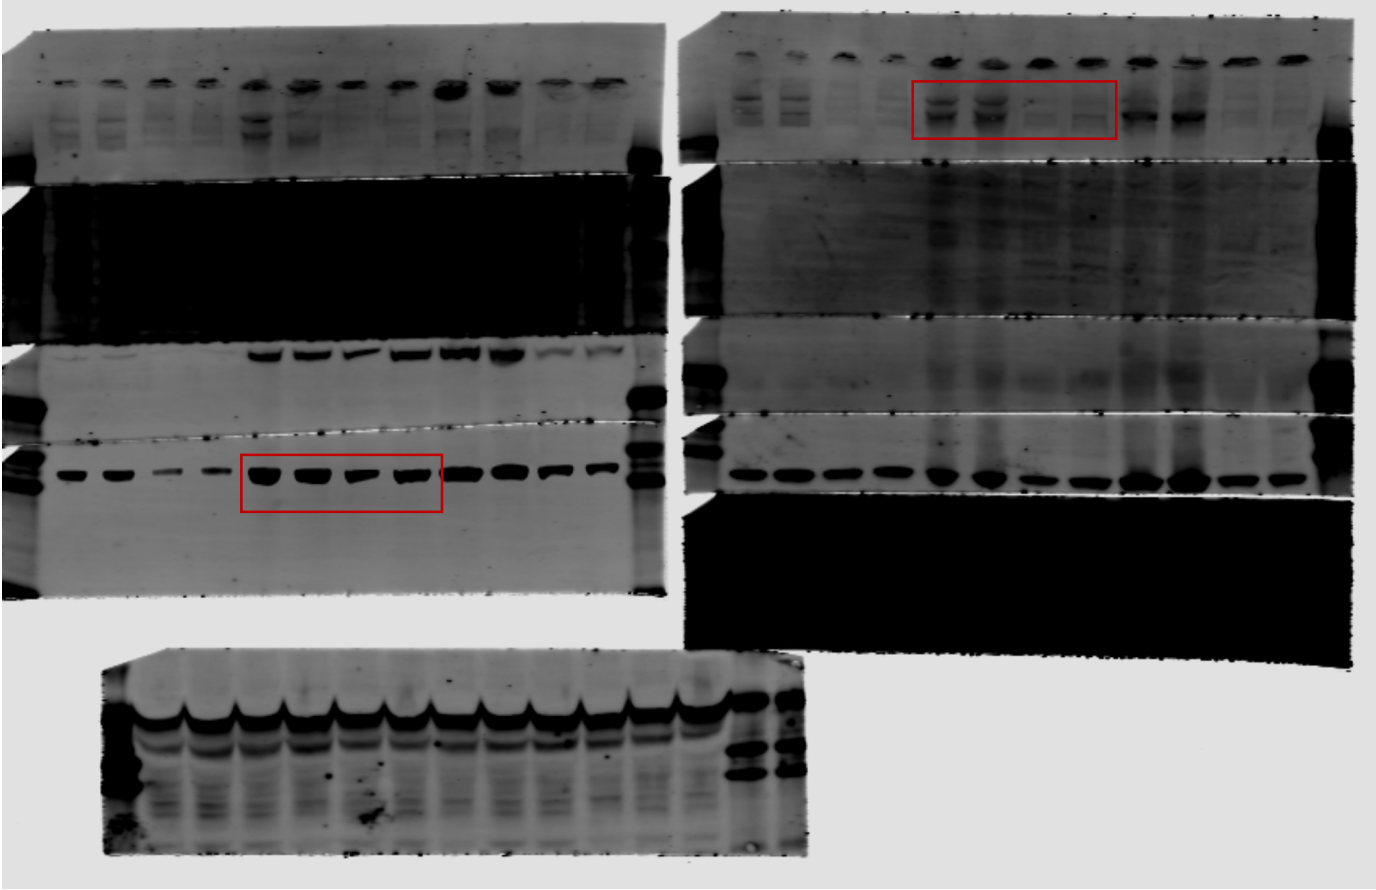

Huwe1  
hepatocytes

Gapdh

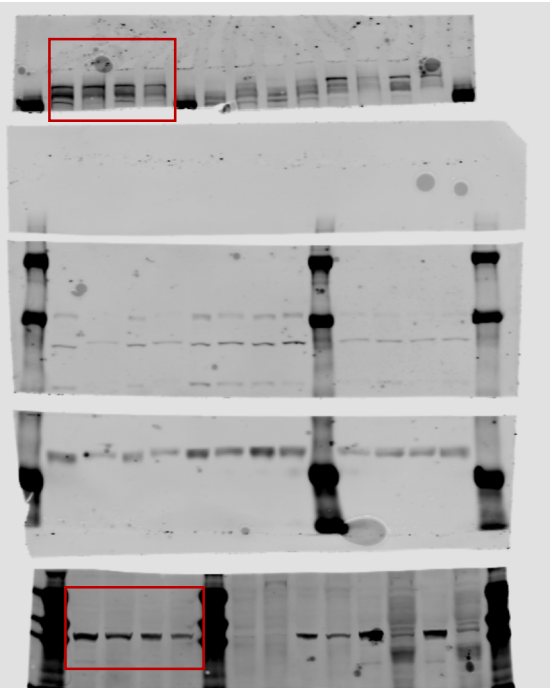

Huwe1

Gapdh

Figure 2A:

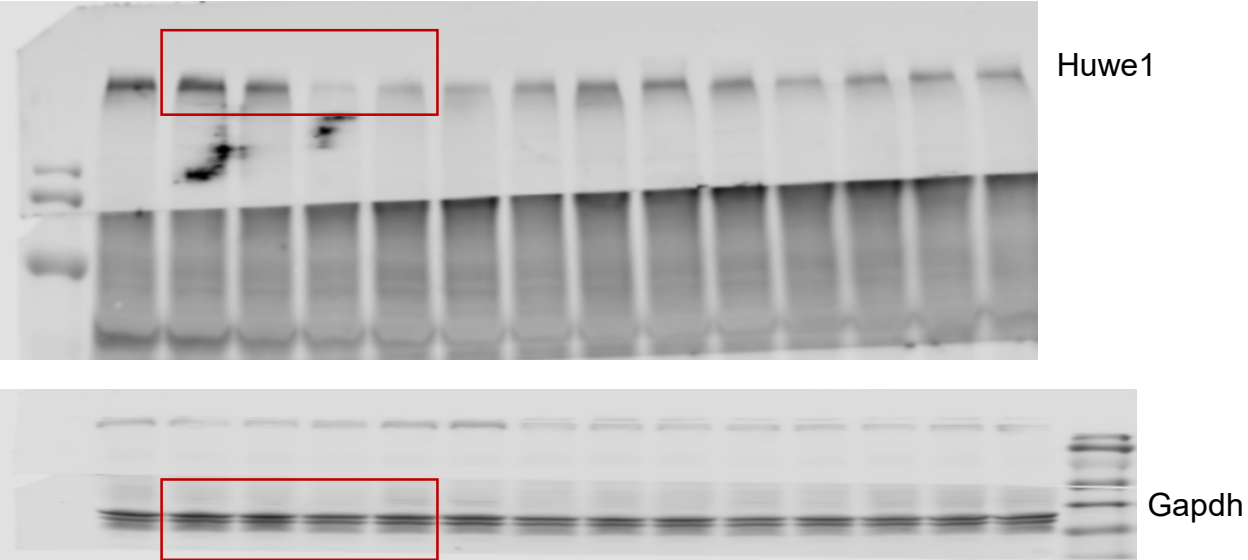

Figure 3 A: left

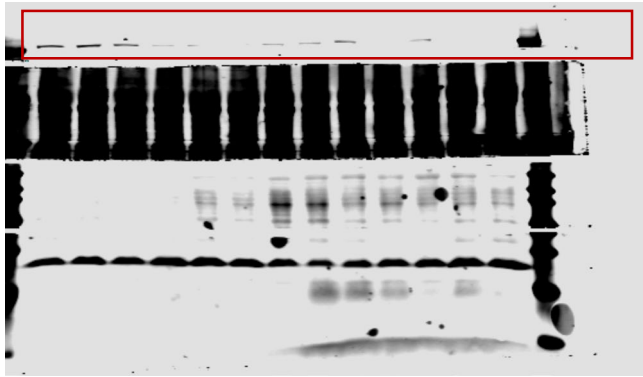

Huwe1

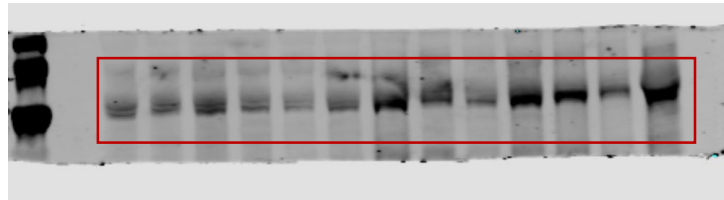

Acsl4

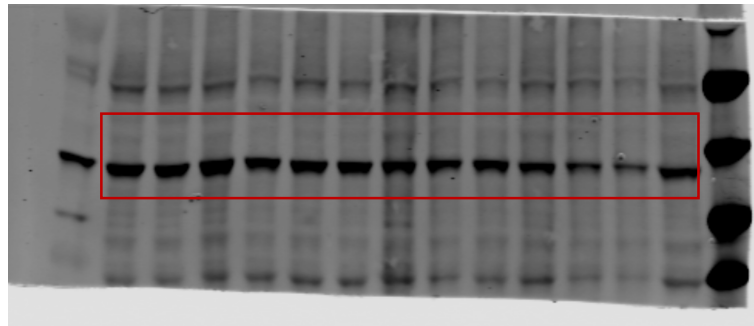

Gapdh

IR

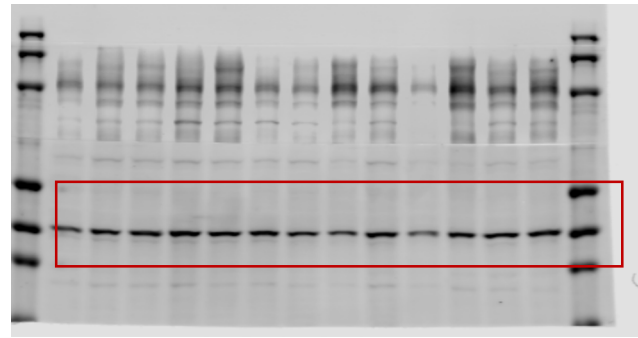

DHODH

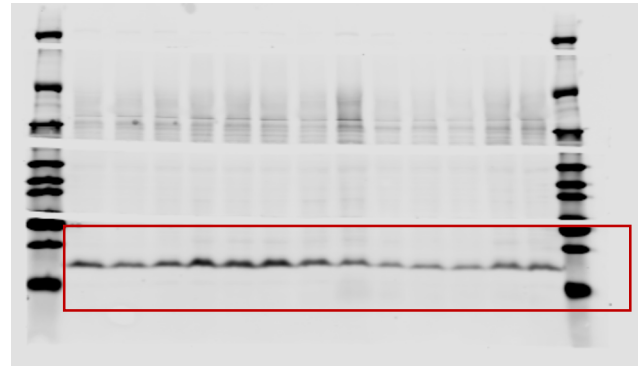

Gpx4

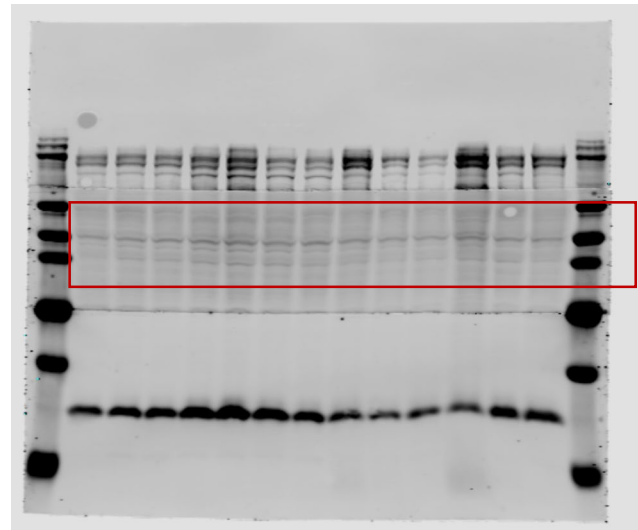

Fsp1

Figure 3 A: right

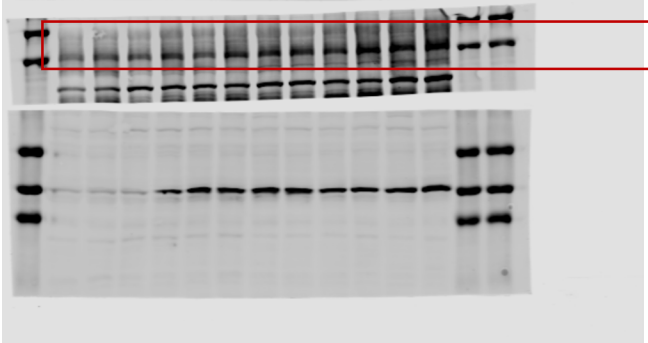

Acsl4

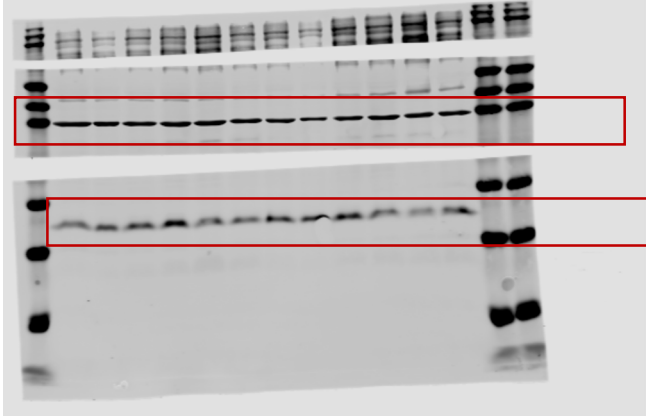

Gapdh

Gpx4

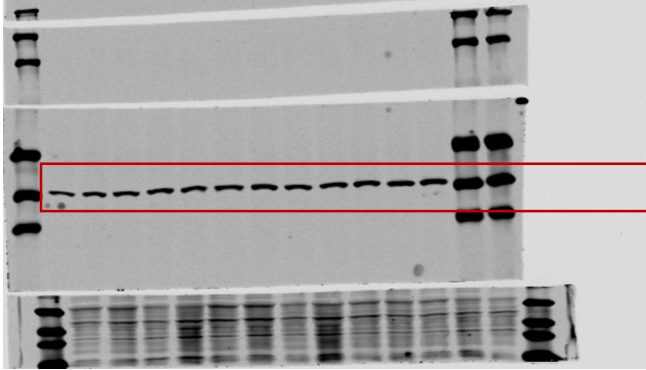

DHODH

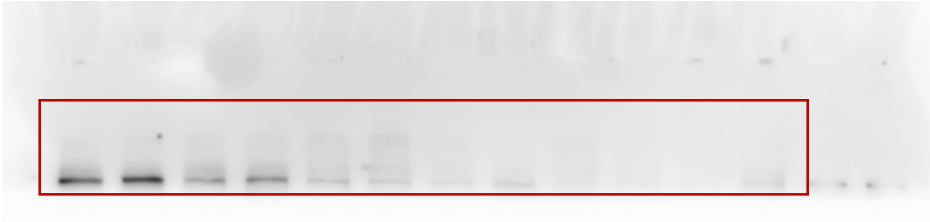

Huwe1

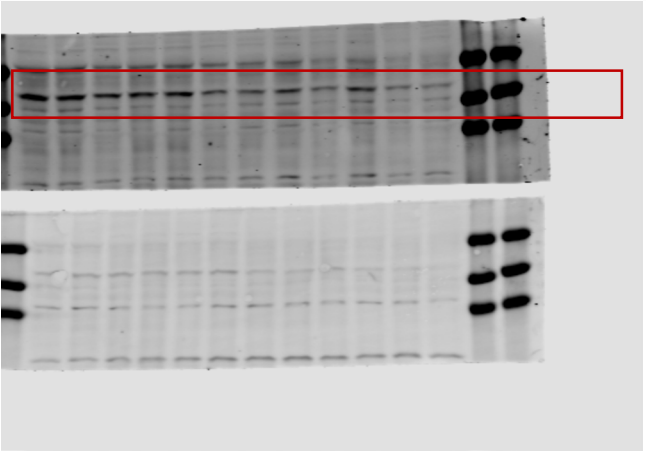

Fsp1

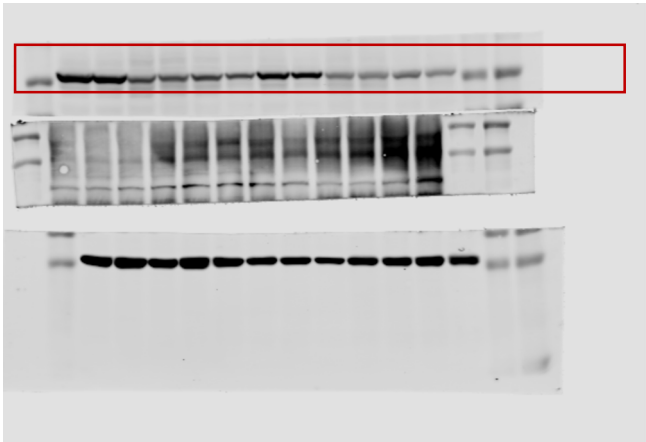

Cyp2e1

Figure 4J

20200509

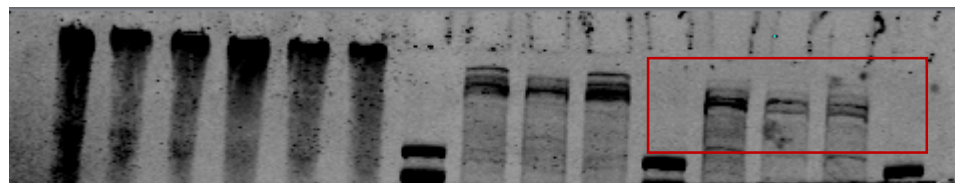

Huwe1

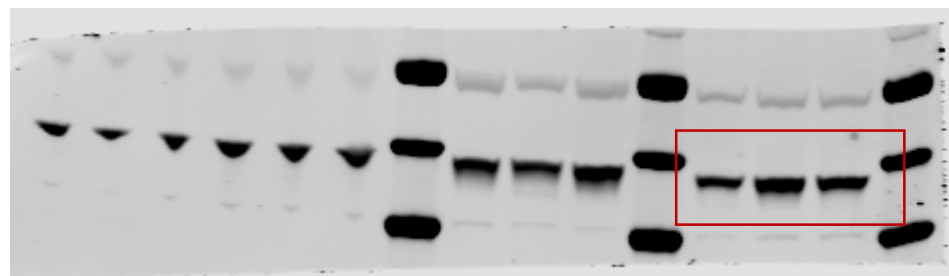

actin



Figure 5A:

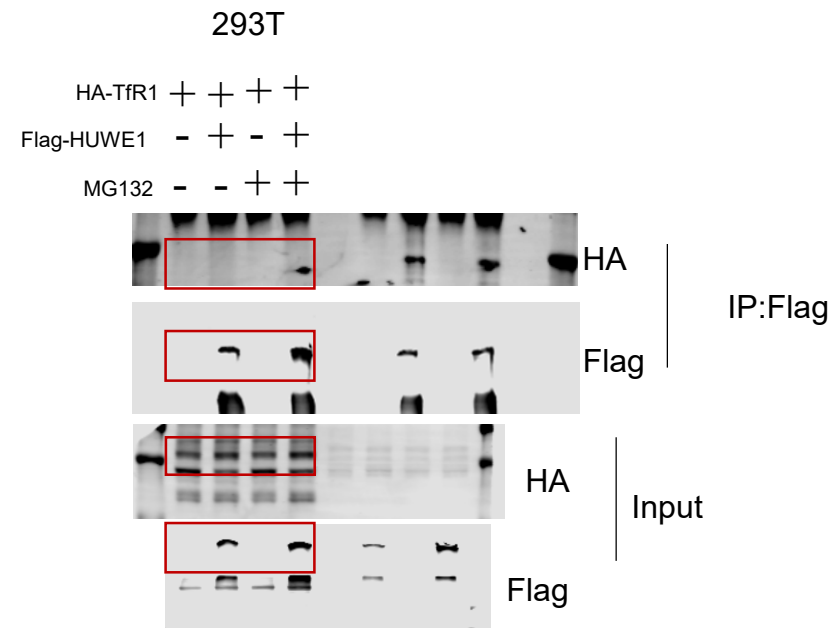

Figure 5B:

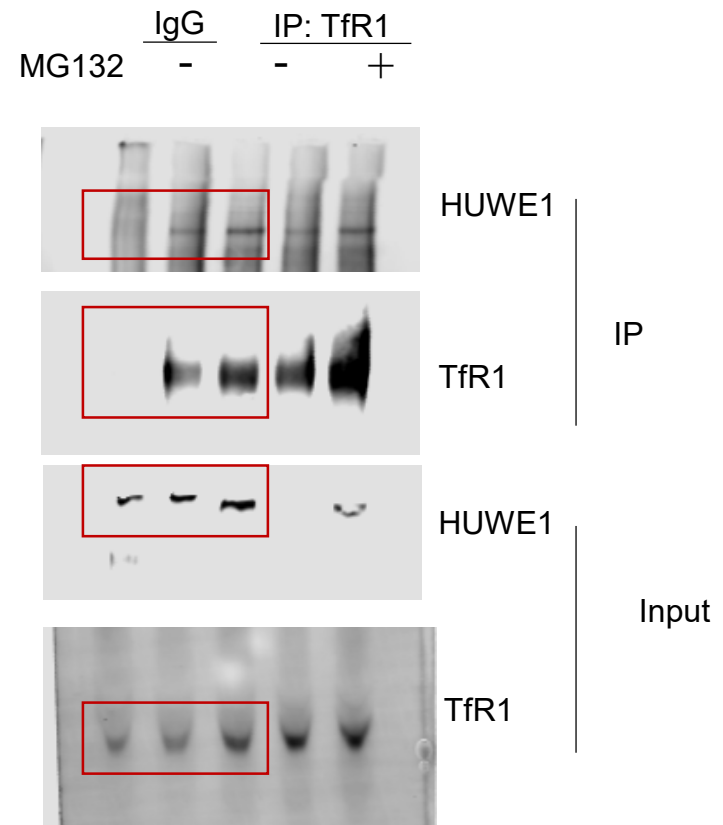

Figure 5C:

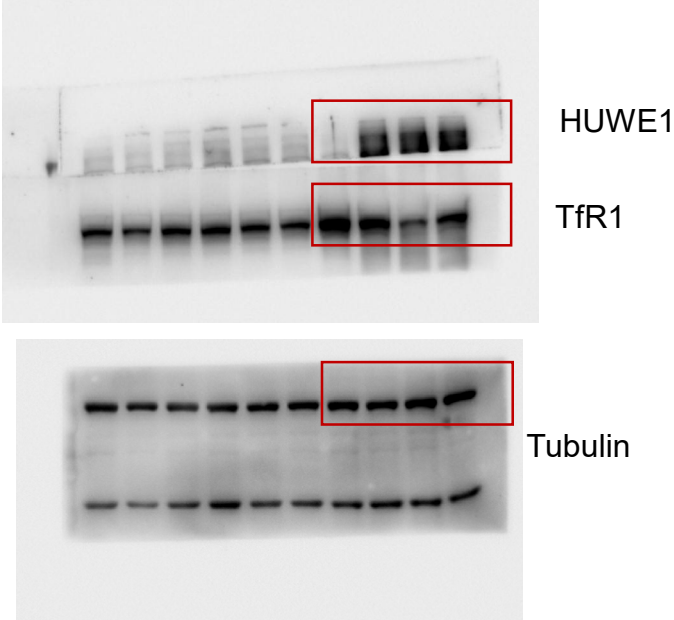

Figure 5D:

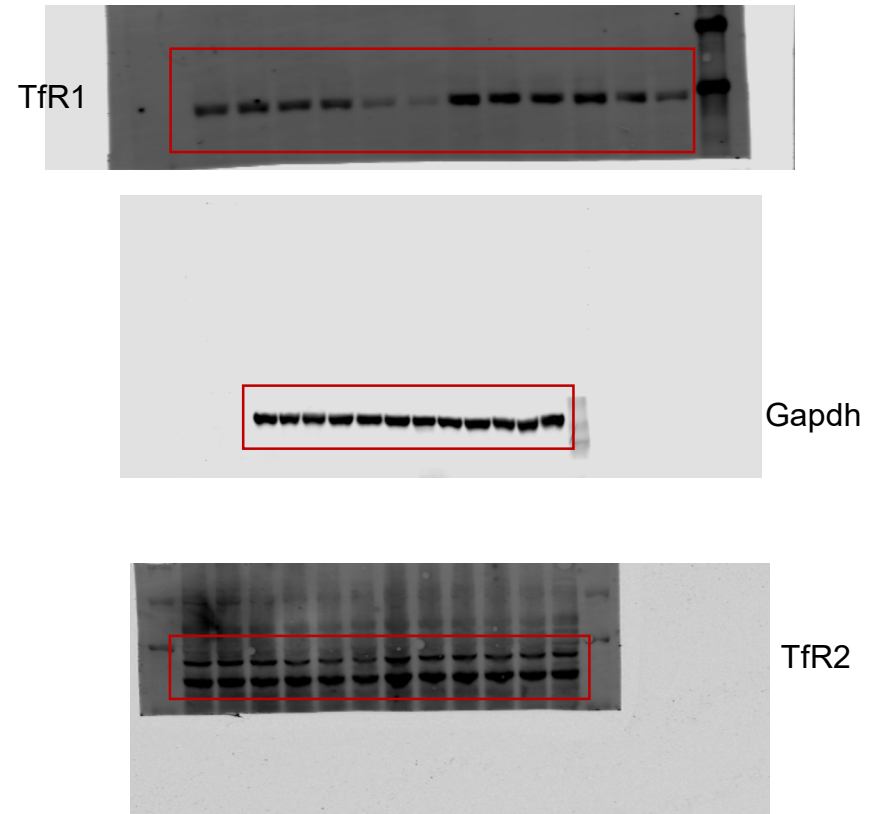

Figure 5E:

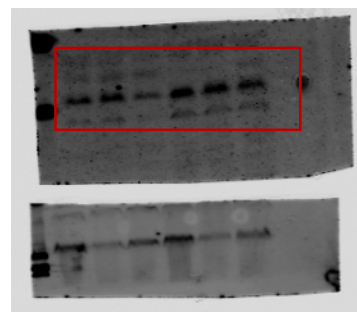

Mcl-1

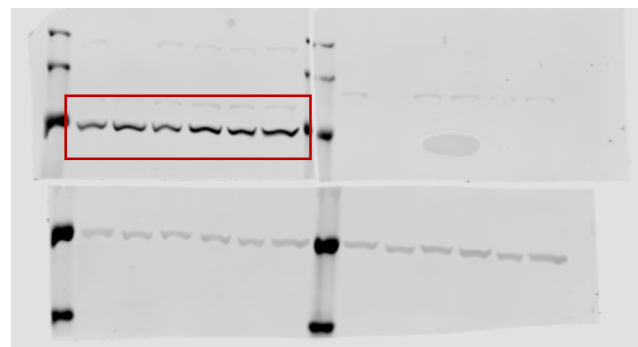

TfR1

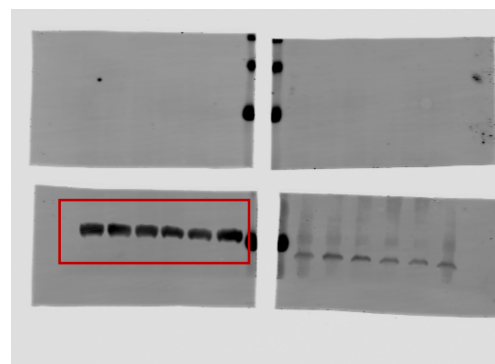

Tubulin

Figure 5F:

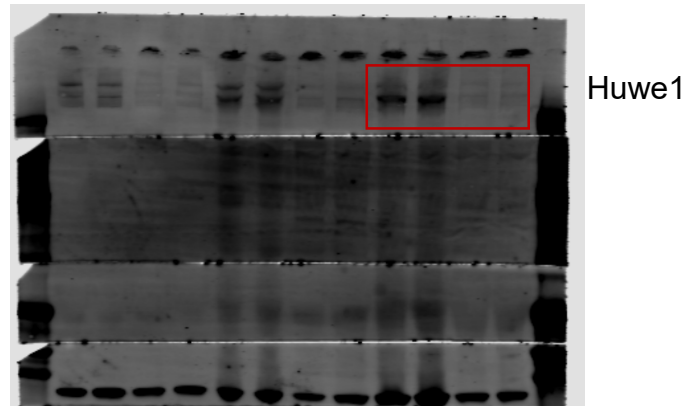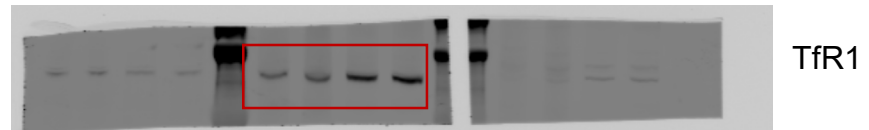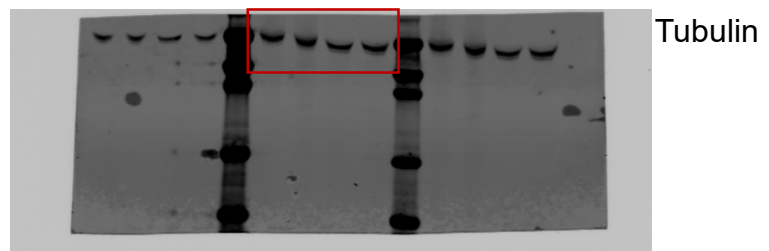

Figure 5G:

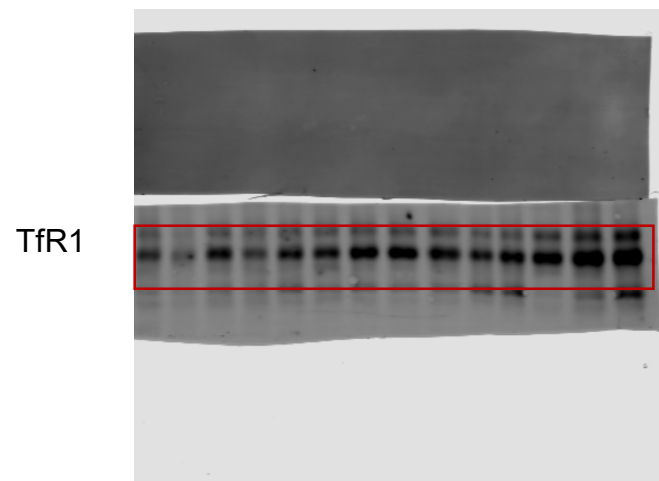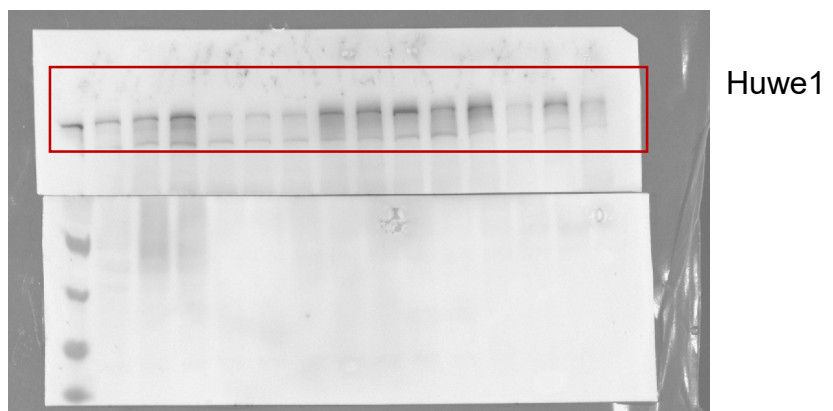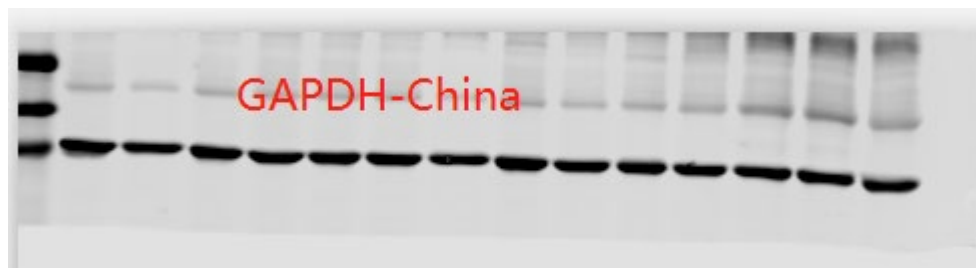

Figure 5H

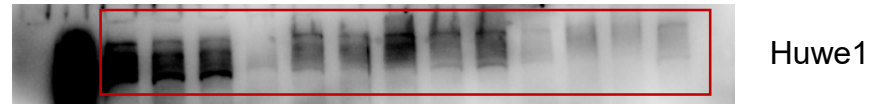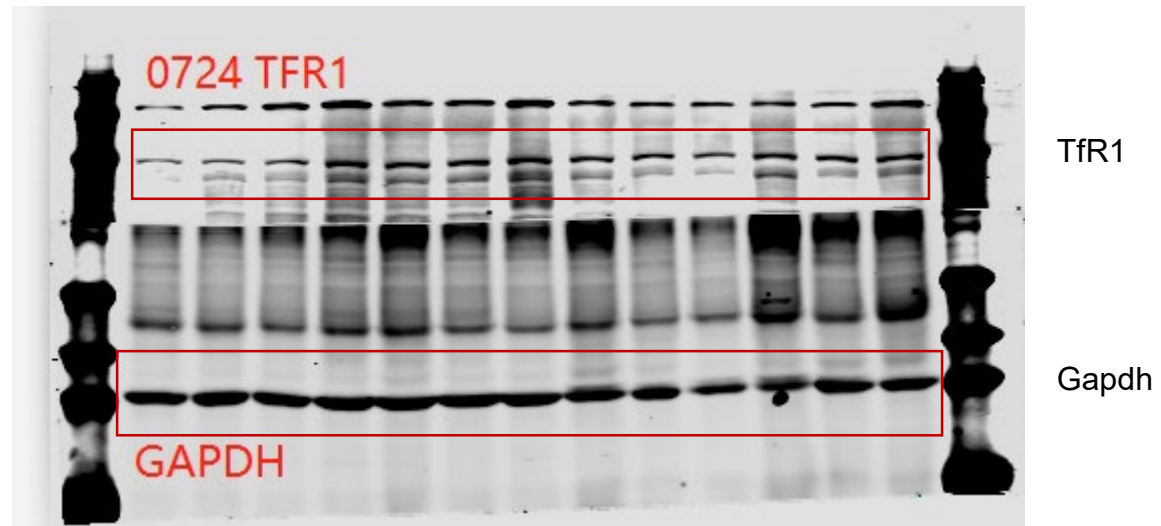



Figure 5I:

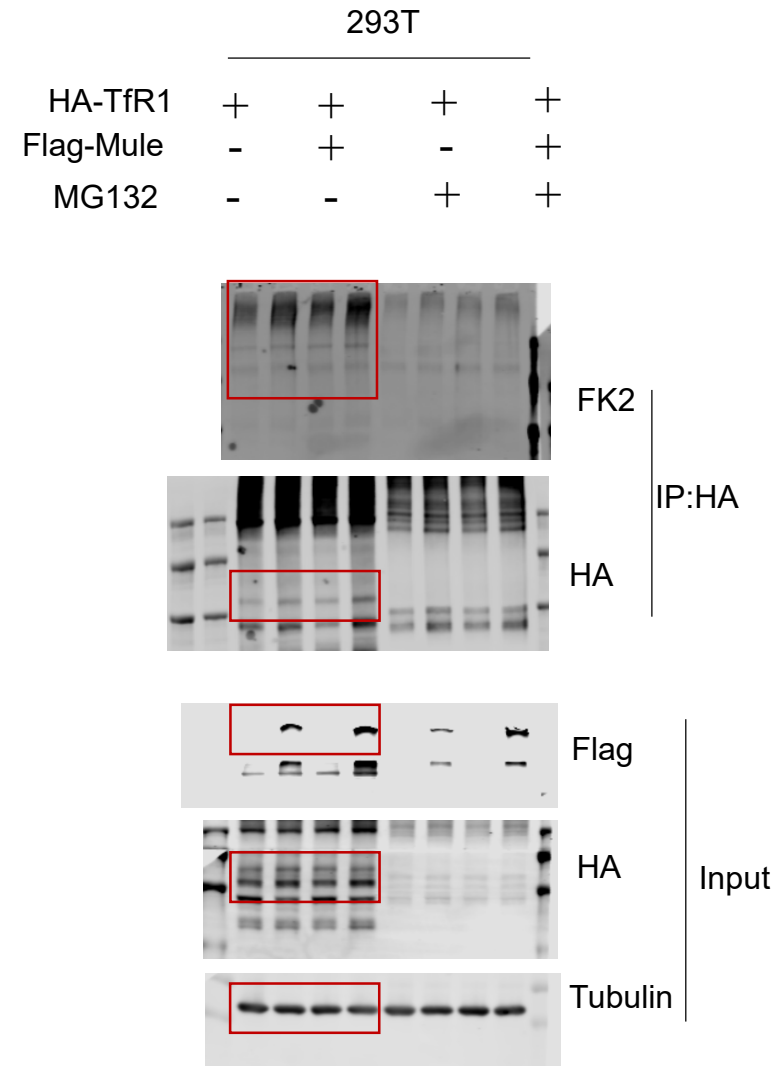

Figure 5J:

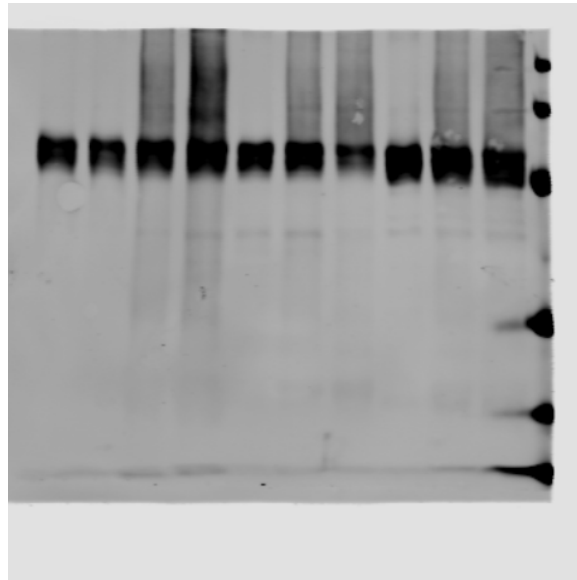

HA

Figure 5K

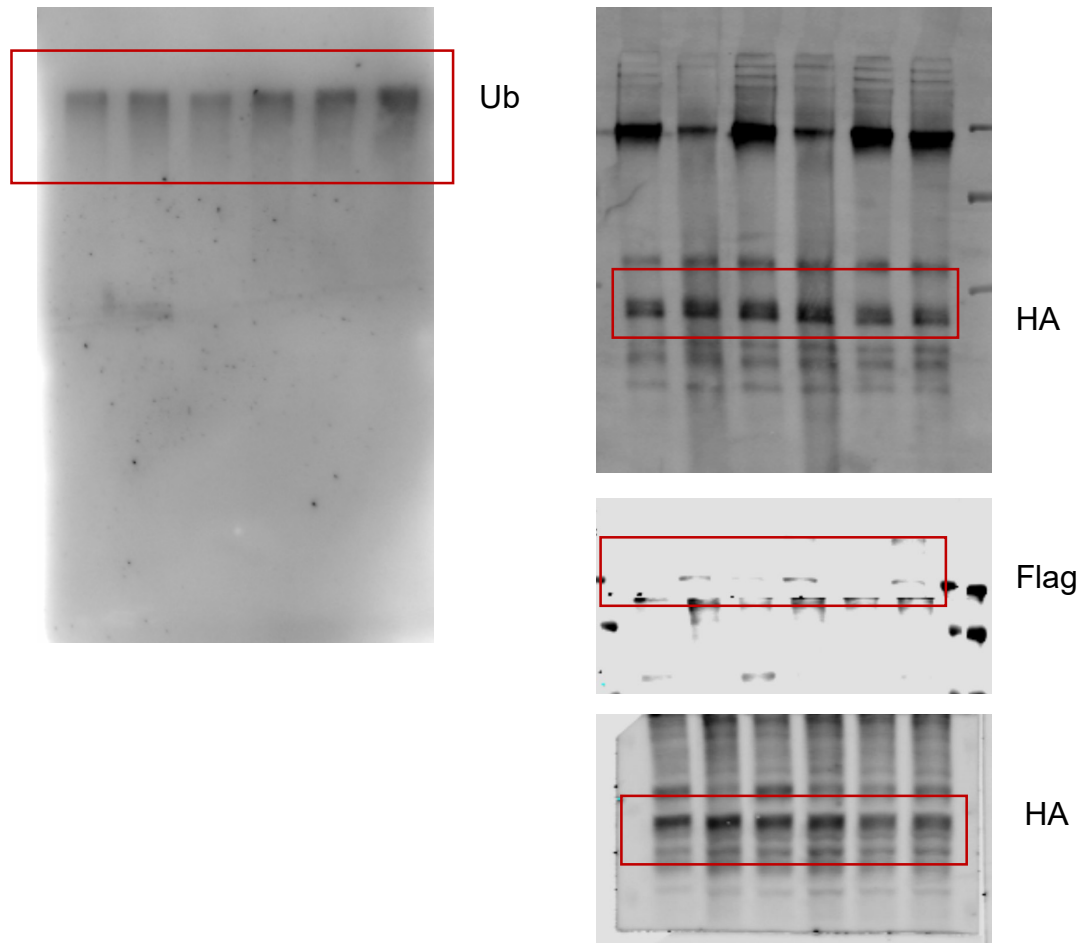

Figure 6H:

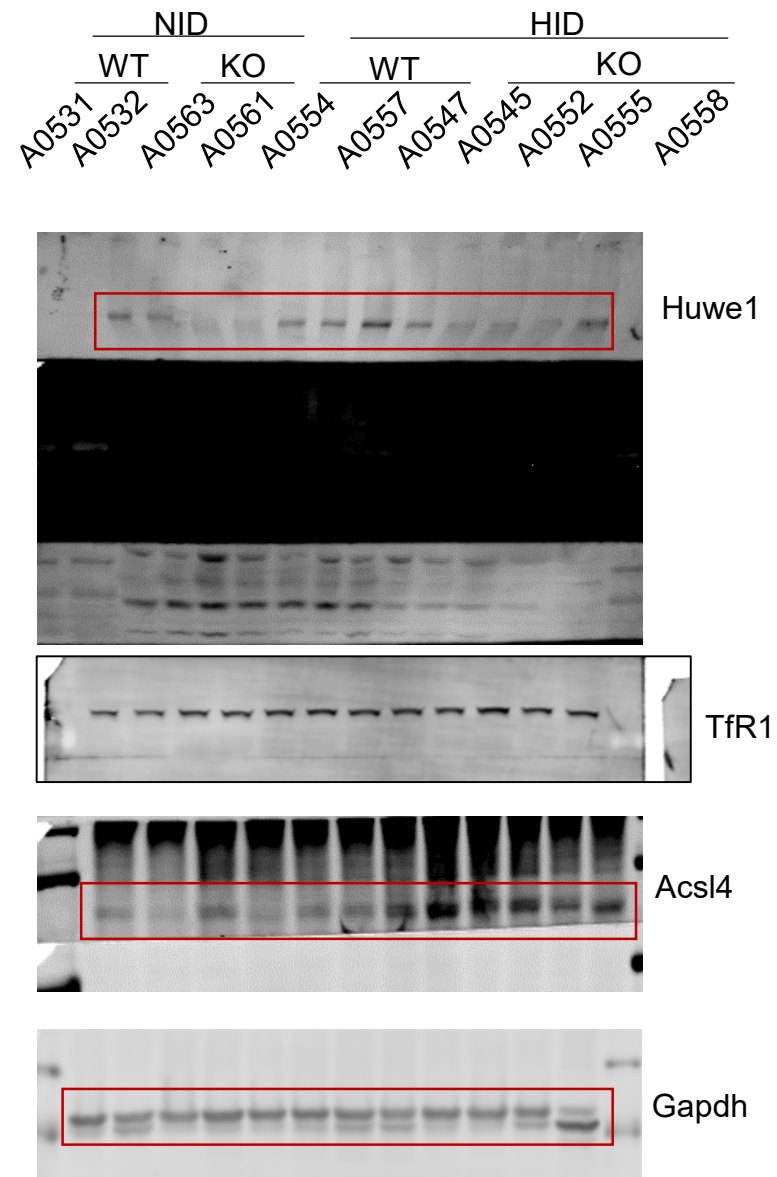

Figure 7G:

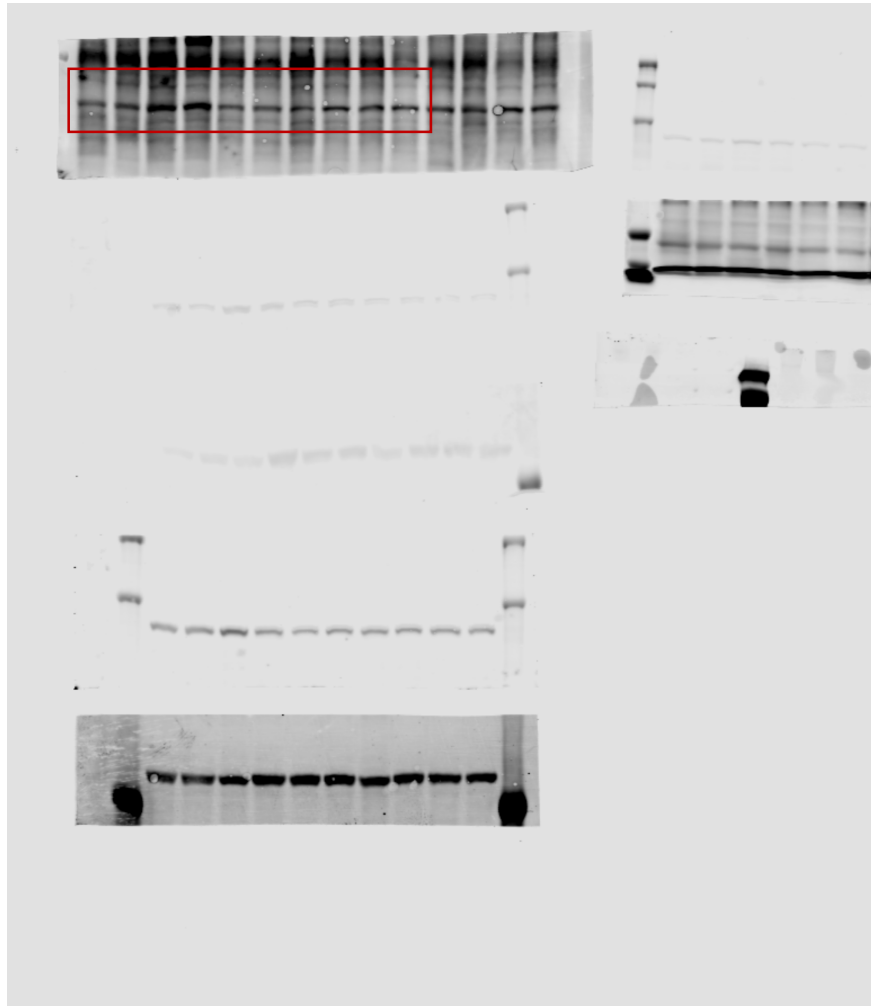

Acs14

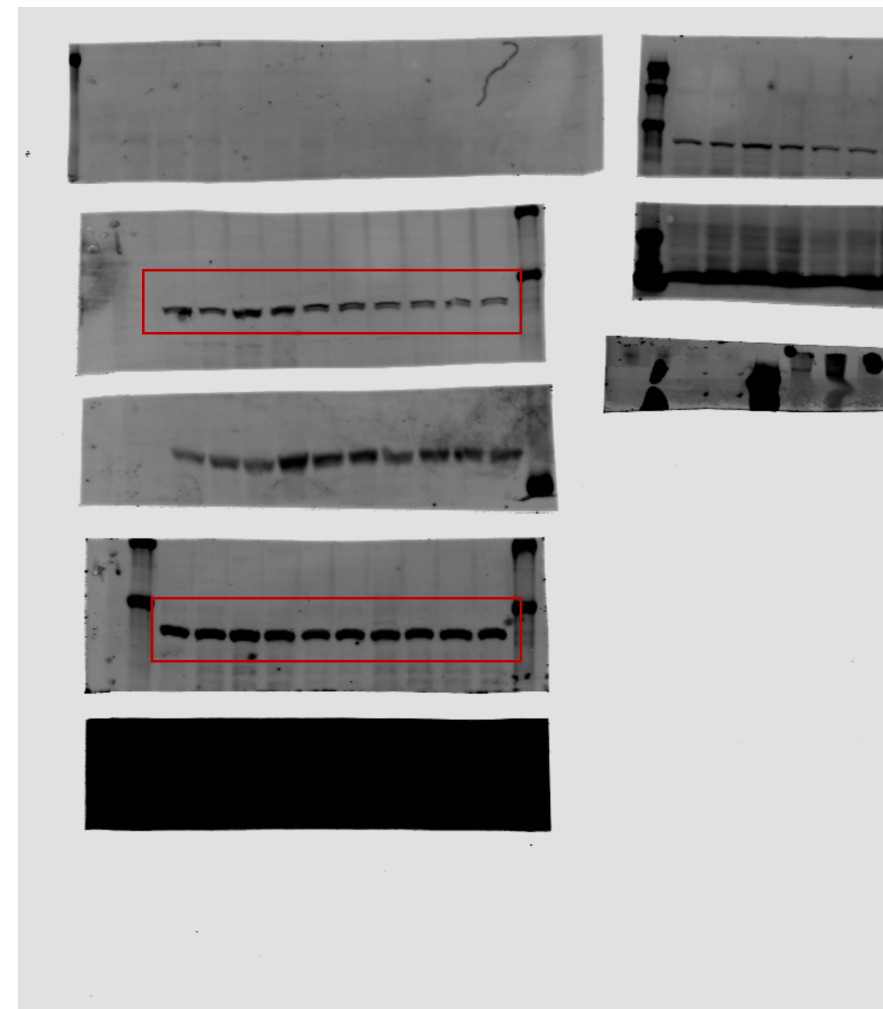

Tfr1

Gapdh

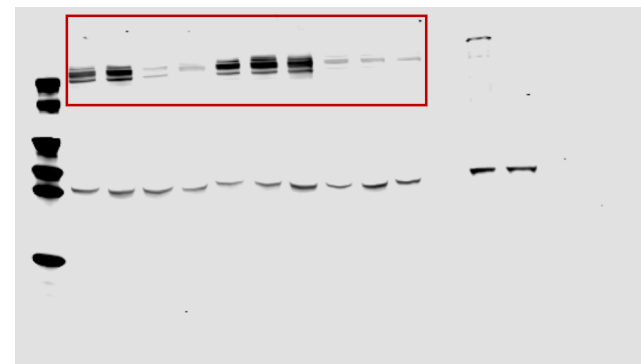

Huwe1

Supplementary Figure 1C:

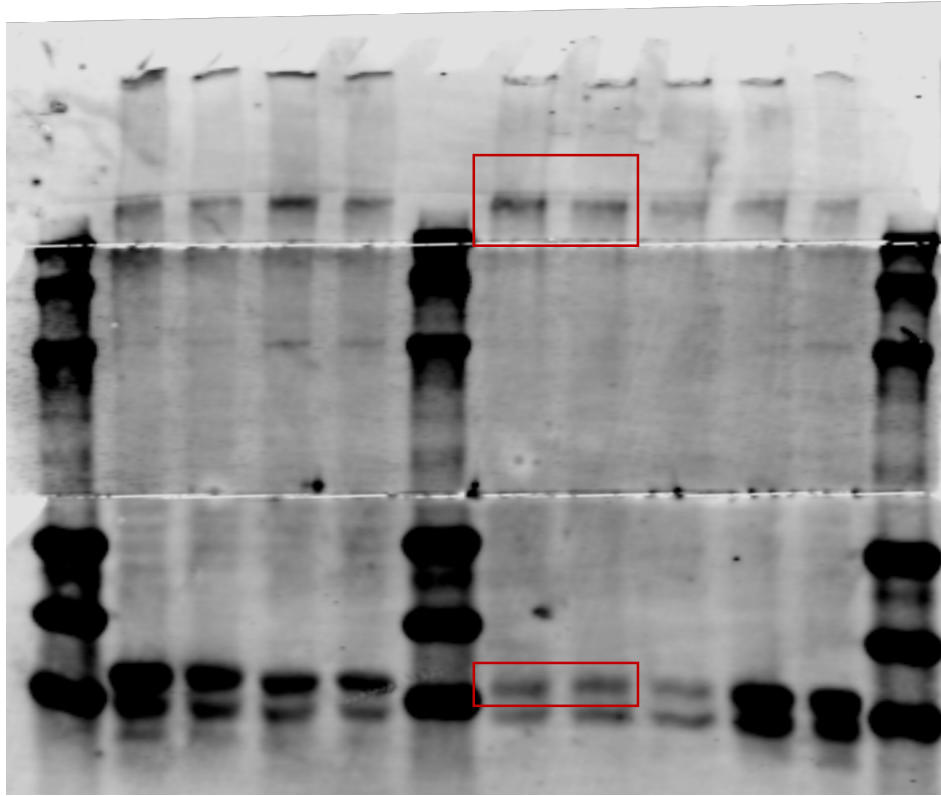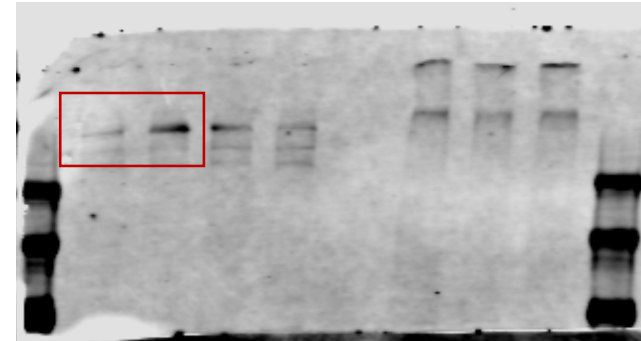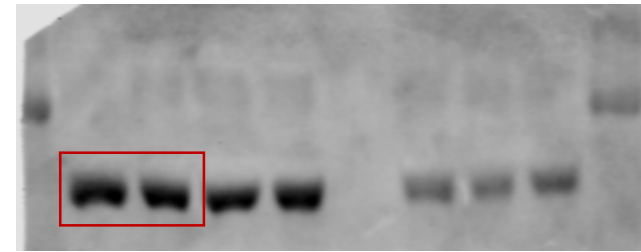

Supplementary Figure 2C:

12h

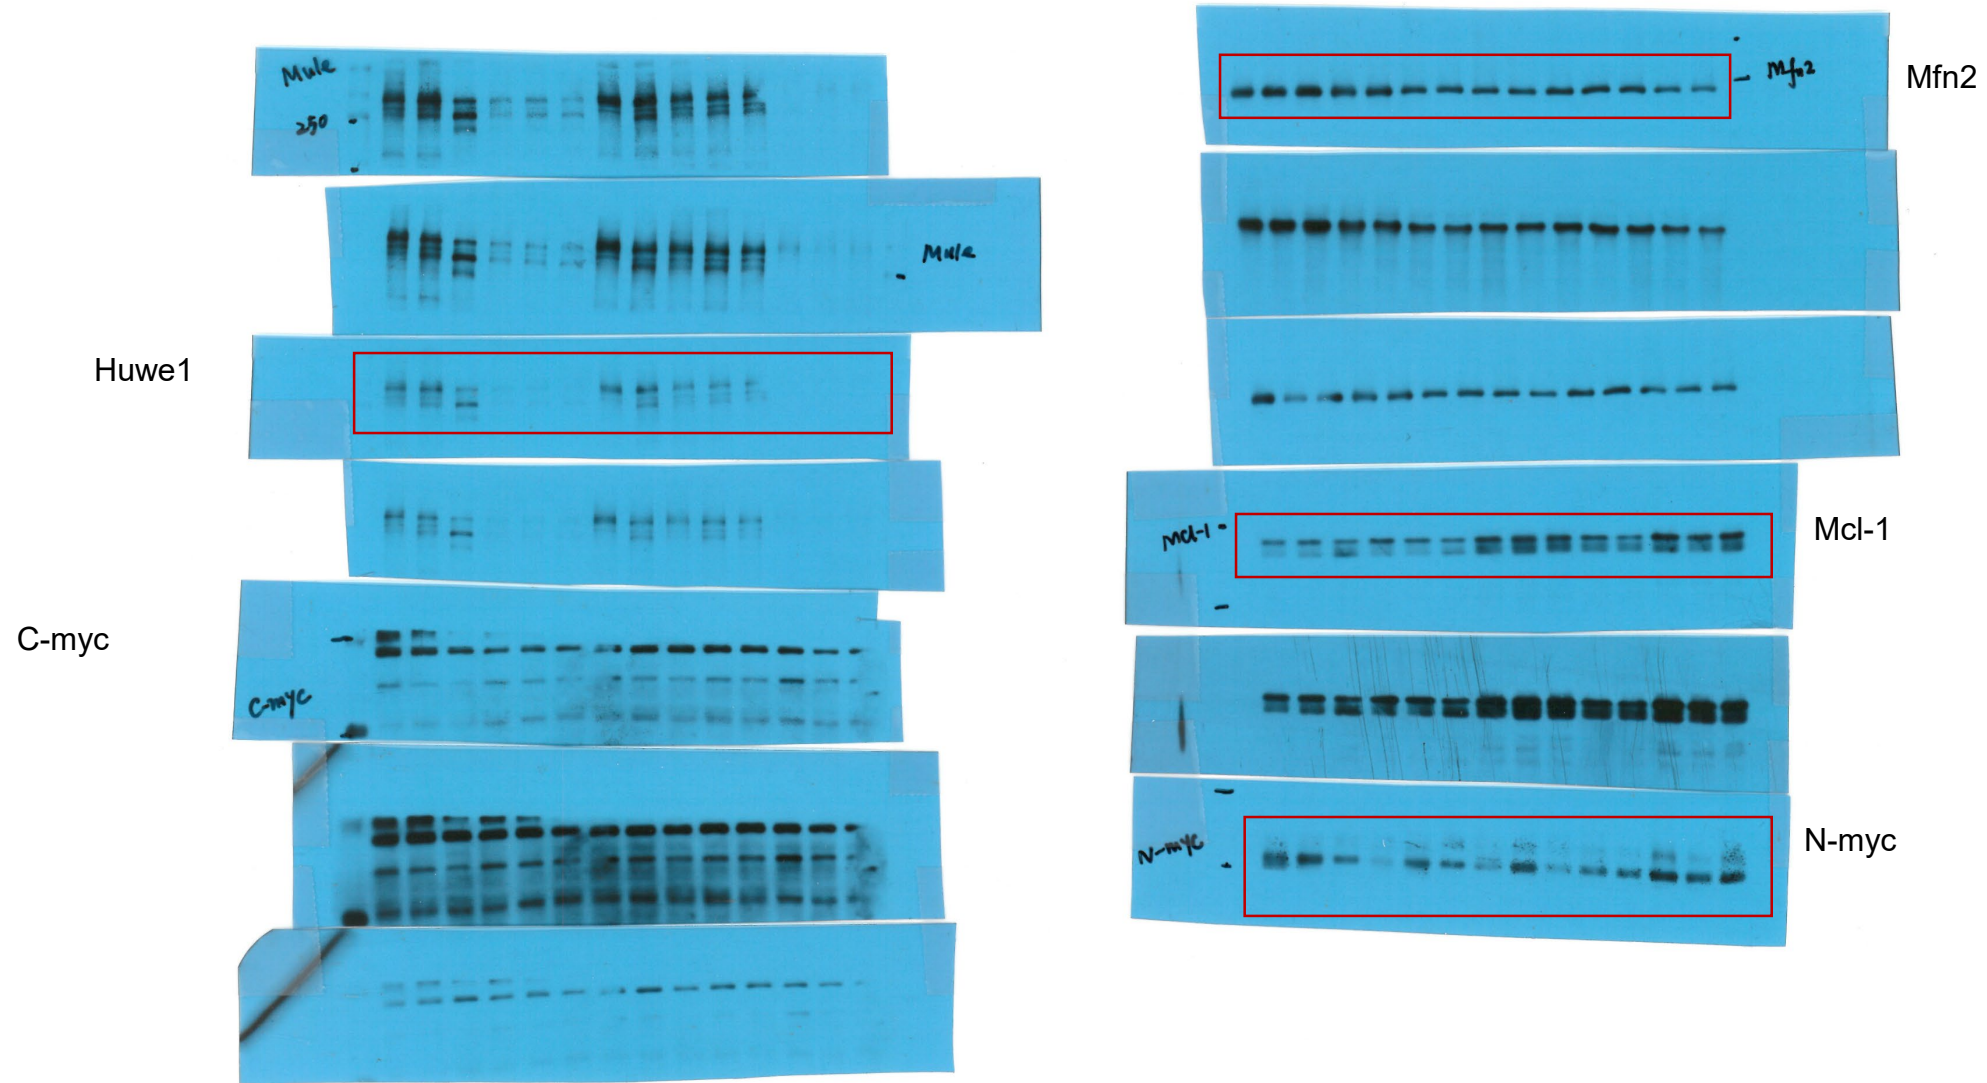

Supplementary Figure 2C:

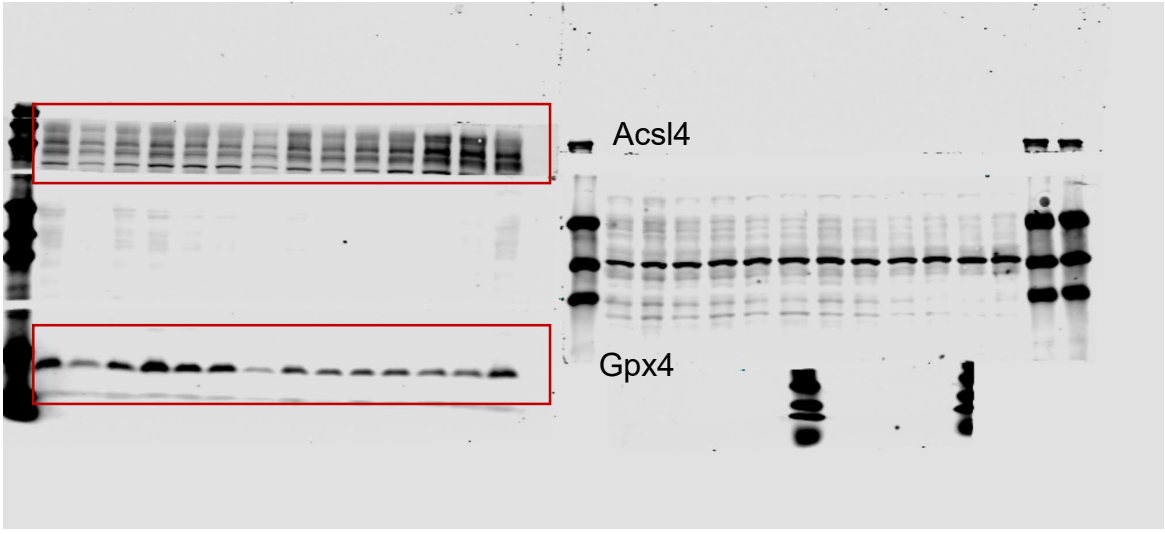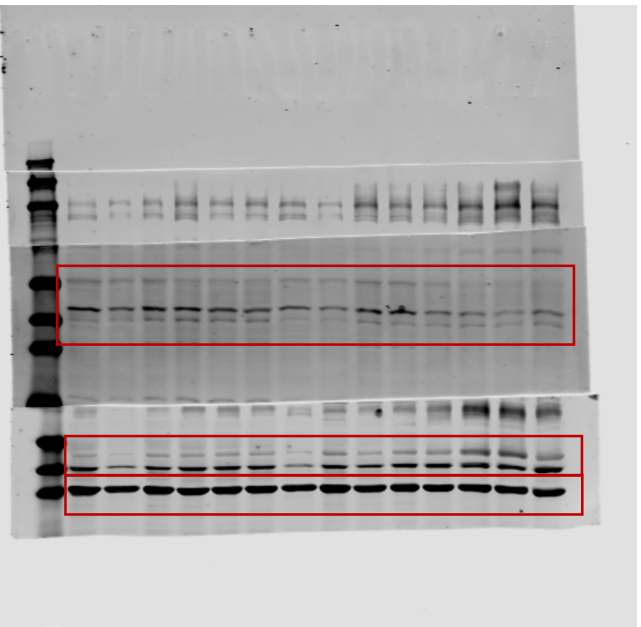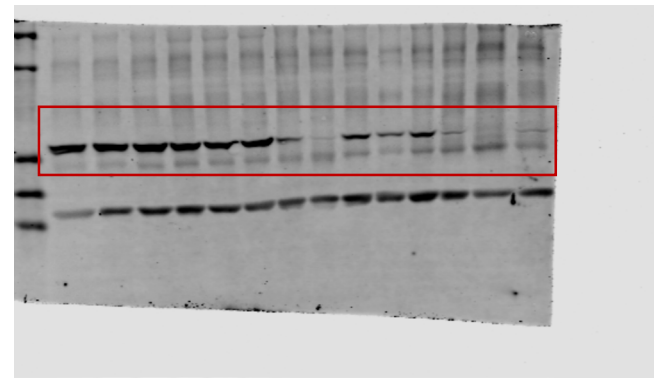

Fsp1

DHODH  
Gadph

Cyp2e1



Supplementary Figure 3C:

Huwe1

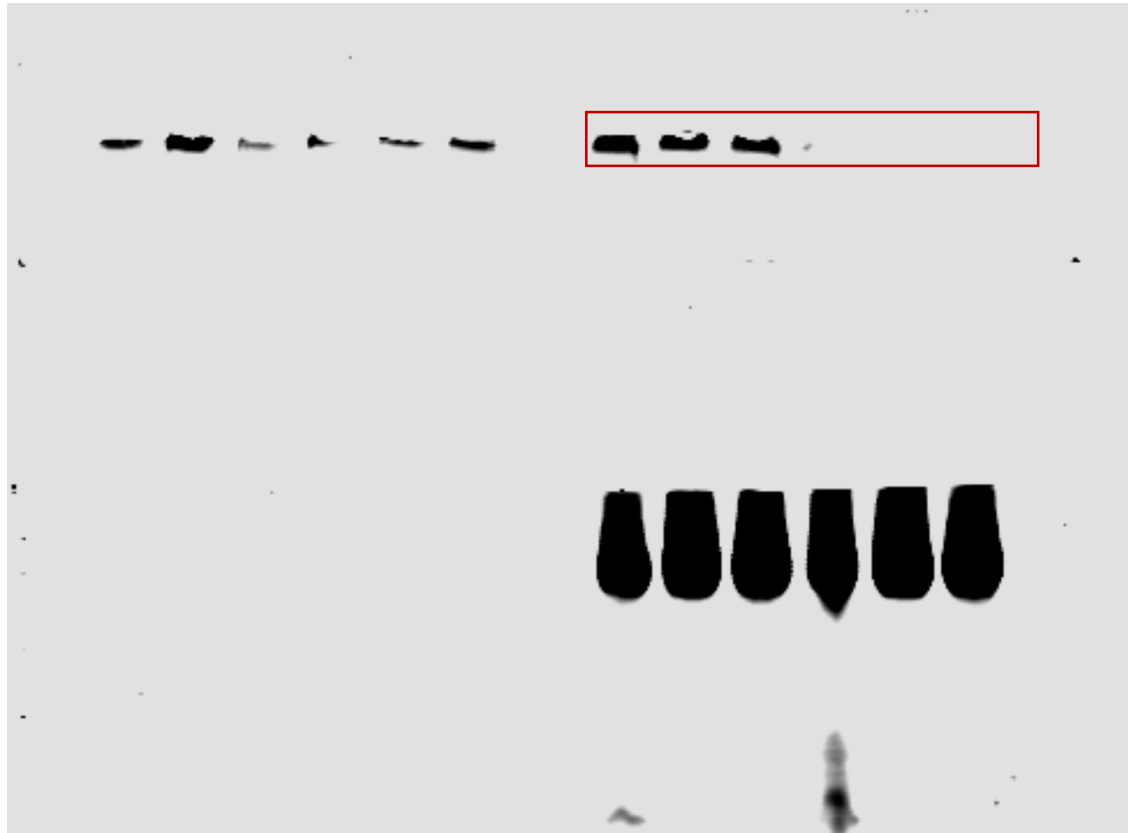

Tubulin

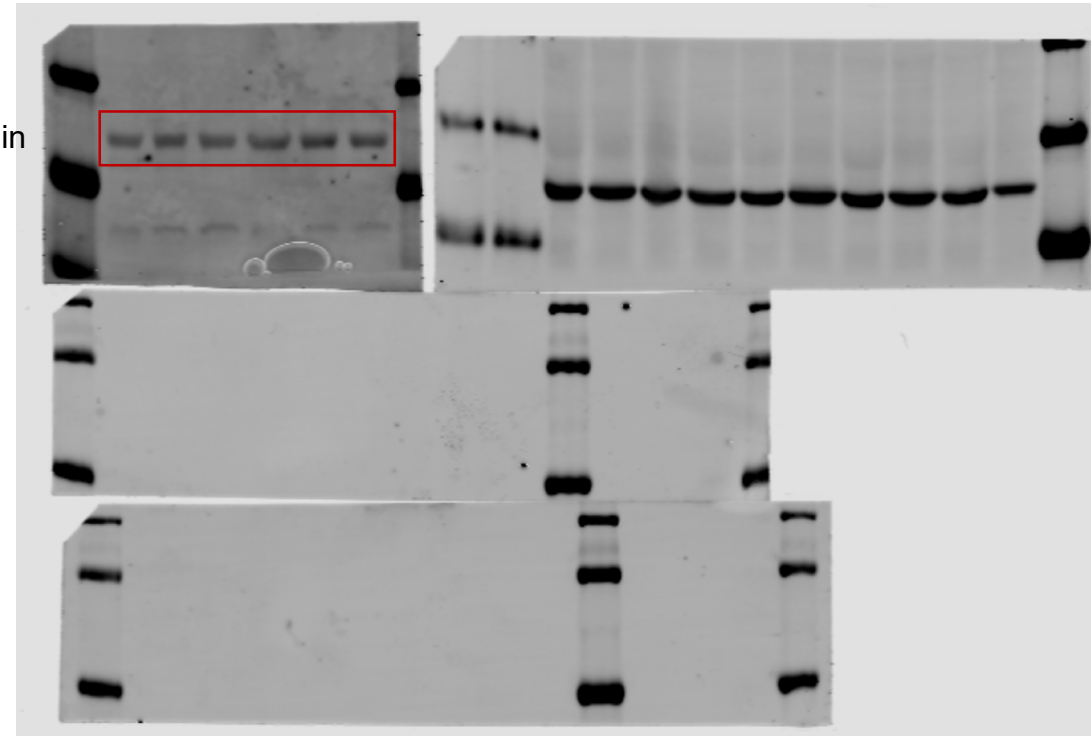

Supplementary Figure 3H:

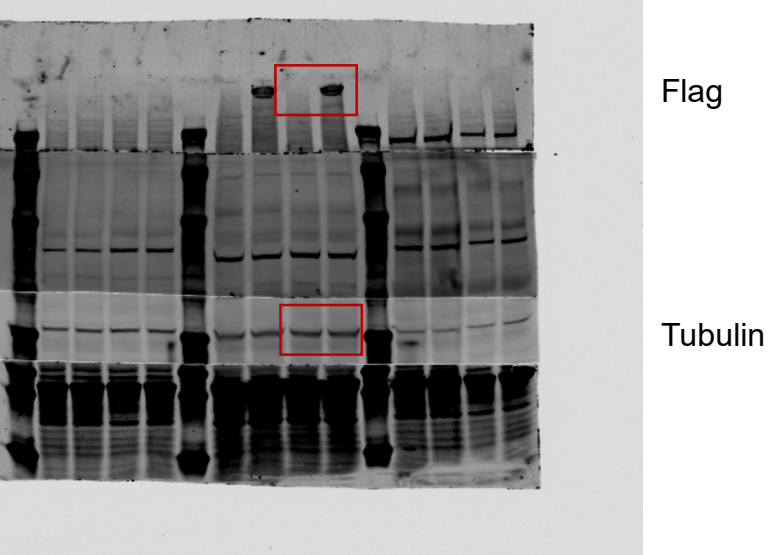

Supplementary Figure 4C:

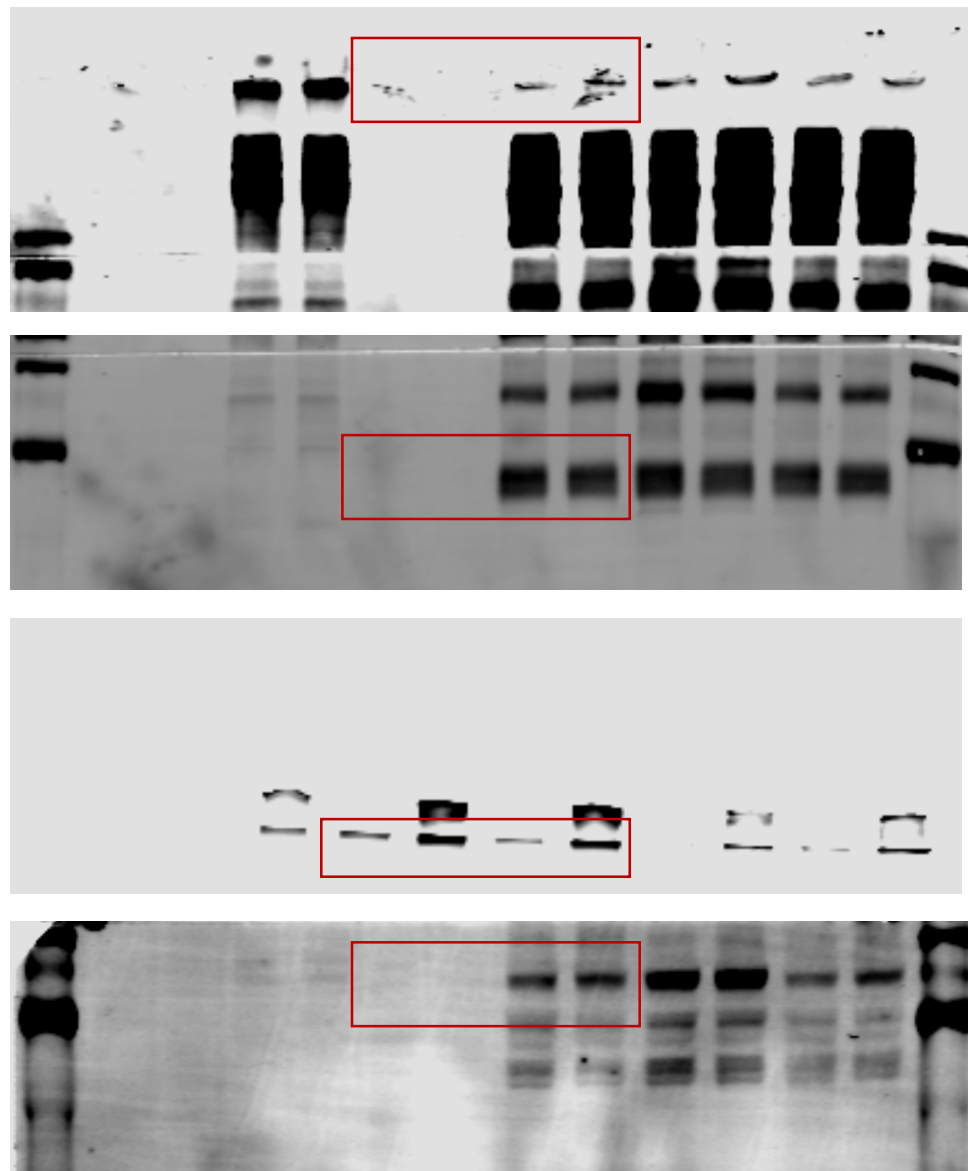

Supplementary Figure 4E:

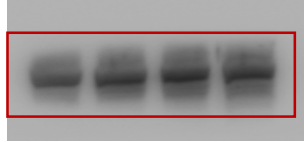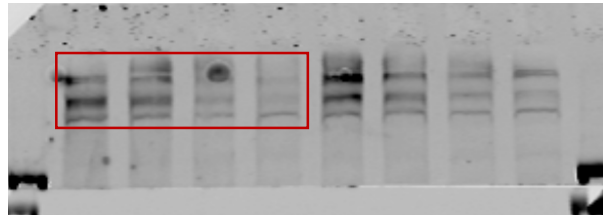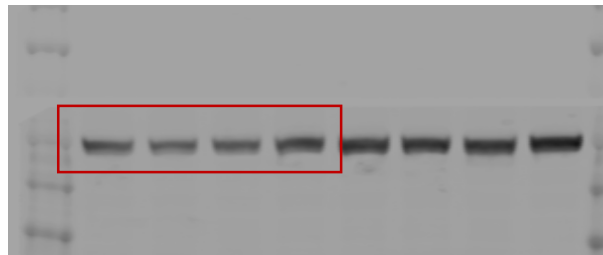

Supplementary Figure 6A:

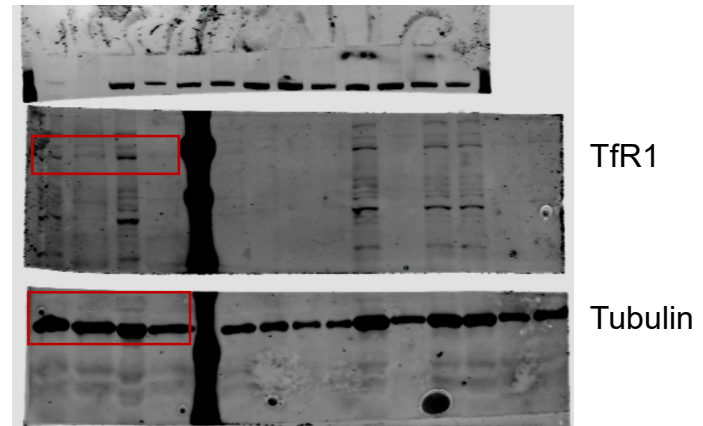

TfR1

Supplementary Figure 6B

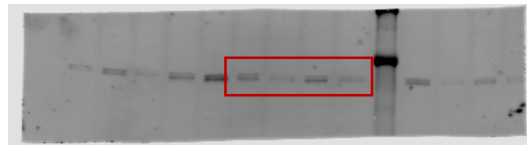

TfR1

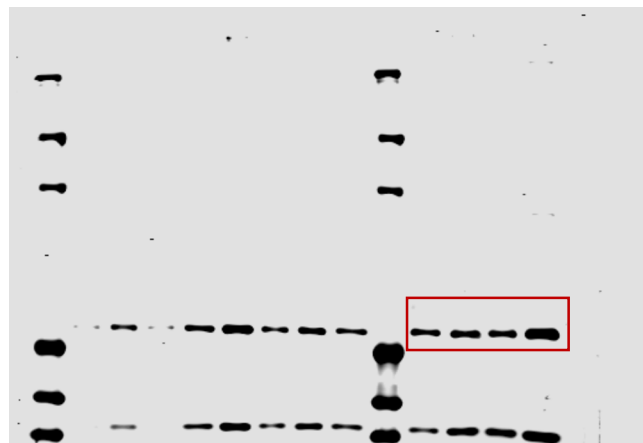

Tubulin

Supplementary Figure 6C:

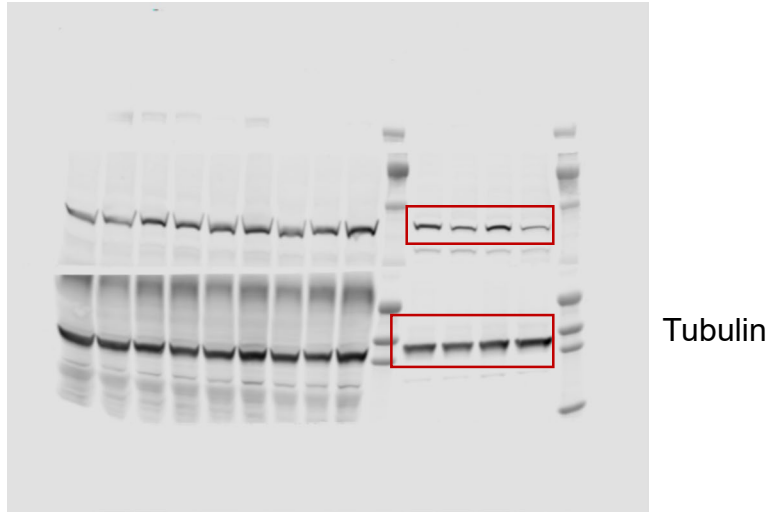

Supplementary Figure 7A:

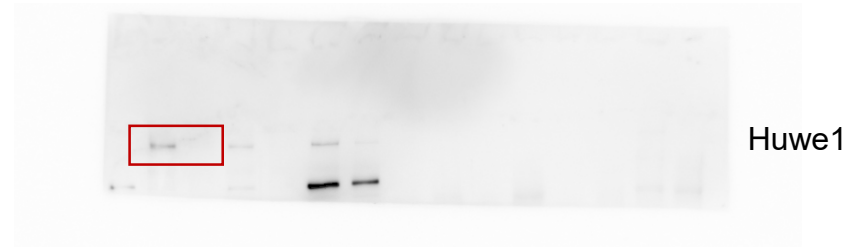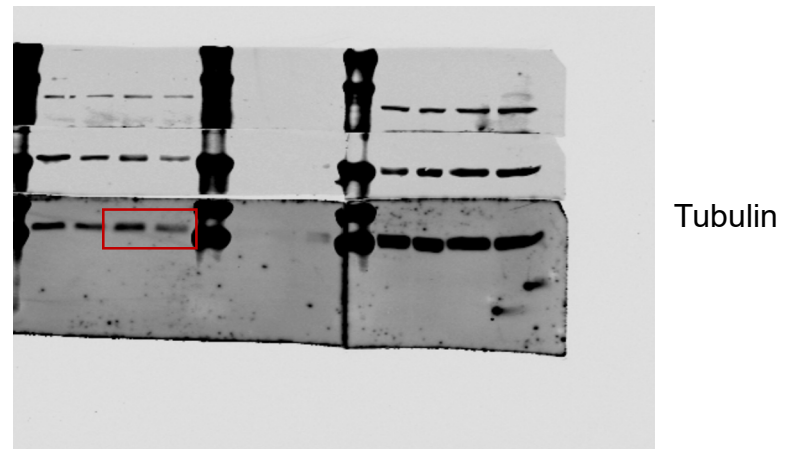

Supplement: 41418_2022_957_MOESM1_ESM.pdf [file 41418_2022_957_MOESM1_ESM.pdf]
